# Supplementary material for: A Quality Improvement Project Using a Patient-Centered Approach to Reduce PRN Medications Among Patients with Serious Mental Illness
Source: Research Square preprint supplement (doi:10.21203/rs.3.rs-7447694/v1), 2025-09-03
Supplement: Supplementary file 1 [file efa7301a6ff8f611e87e318e.docx]

**Supplement Tables 1a & 1b**.

**PRN MEDICATION USE FREQUENCY AUDIT TOOLS**

**Month/Year:**

**PRN *WEEKLY* AUDIT REPORT: DATES: ______________to_______________**

| **Patient Name** | **Psych**  **Name/totals** | **Pain**  **Name/Totals** | **Other**  **Name/Totals** | **Totals of All PRN Meds** |
| --- | --- | --- | --- | --- |
|  |  |  |  |  |
|  |  |  |  |  |
|  |  |  |  |  |
|  |  |  |  |  |
|  |  |  |  |  |
|  |  |  |  |  |

**PRN *MONTHLY* AUDIT REPORT: Month and Year: _________________**

| **Patient Name** | **Psych**  **Name/Totals** | **Pain**  **Name/Totals** | **Other**  **Name/Totals** | **Totals of All PRN meds** |
| --- | --- | --- | --- | --- |
|  |  |  |  |  |
|  |  |  |  |  |
|  |  |  |  |  |
|  |  |  |  |  |
|  |  |  |  |  |
|  |  |  |  |  |

| **Supplement Table 2. Examples of CLASSES OF PRN MEDICATIONS** | | | | | | | |
| --- | --- | --- | --- | --- | --- | --- | --- |
| **Analgesics** | **Anxiolytics**  **Sedatives**  **Hypnotics** | **EPS Medications** | **GI Medications** | **Laxatives** | **Respiratory** | **Antipsychotic** | **Other** |
| All NSAIDS | Benzodiazepines | Benztropine | All Antacids | All Laxatives | Lozenges | All Antipsychotics | Zinc Oxide |
| Acetaminophen | Z-drugs (Ambien, Lunesta, Sonata) | Trihexyphenidyl | Anti-emetics | All Stool Softeners | Cough Syrups |  | Artificial Tears |
|  | Buspirone |  | Magnesium Hydroxide | Bisacodyl | Albuterol |  | Ketoconazole |
|  | Melatonin |  | Loperamide | Milk of Magnesia | Nasal Spray |  | Emergen C |
|  | Diphenhydramine |  |  |  | Antiallergy |  | Nicotine Gum or Lozenge |
|  | Chloral Hydrate |  |  |  |  |  | Hydrocortisone Cream |
|  | Hydroxyzine |  |  |  |  |  |  |

| **Supplement TABLE 3**. REASONS FOR DISCONTINUATION OR TAPER OF PRN MEDICATIONS GROUPED BY MEDICATION CLASS (n = 24) | | | | | | | | |
| --- | --- | --- | --- | --- | --- | --- | --- | --- |
| **Reasons** | **Analgesics** | **Anxiolytics1** | **EPS2** | **Gastro-Intestinal3** | **Laxatives** | **Respiratory** | **Antipsychotics** | **Other** |
| No Reason Mentioned | 1 |  | 1 |  |  |  |  |  |
| No Longer Indicated | 2 | 2 |  | 4 | 3 | 1 | 2 | 3 |
| Contraindication |  |  |  |  |  |  |  |  |
| Adverse Drug Reaction |  |  |  |  |  |  |  |  |
| Ineffective |  |  |  |  |  |  |  |  |
| At Request of Patient | 1 | 2 |  | 2 | 2 |  | 1 | 4 |
| Drug-Drug Interaction | 1 |  |  |  |  |  |  |  |
| Switched to an Alternative Medication | 1 |  |  |  |  |  |  |  |
| Regimen Change (from PRN to Scheduled) | 2 | 1 |  |  | 1 |  |  |  |
| Other | 1 | 1 |  | 1 | 1 |  | 1 |  |
| **Total PRN Discontinuation or Taper** | 9 | 6 | 1 | 7 | 7 | 1 | 4 | 7 |
| **Total PRN Prescriptions (out of 86)** | 17 | 11 | 2 | 16 | 12 | 8 | 4 | 16 |
| **Percent Discontinued or Tapered** | 52.9% | 54.5% | 50.0% | 43.8% | 58.3% | 12.5% | 100% | 43.8% |
| **1=Including Sedatives and Hypnotics; 2 = EPS meds mainly benztropine but trihexyphenidyl also, 3=All GI Medications except Laxatives** | | | | | | | | |

**Supplement TABLE 4: SAMPLE COMMENTS FROM THE POST-QI IMPLEMENTATION SURVEY**

|  | **Comments From Healthcare Professionals** |
| --- | --- |
| 1 | *Deprescribing and re-prescribing may be frequent in some patients (within a couple of days)* |
| 2 | *Deprescribing may not reduce administrative burden for clinic staff if patients have to be re-prescribed* |
| 3 | *Routine scheduled medication dosage can be better determined as well as effectiveness* |
| 4 | *Deprescription does not increase awareness of smoking cessation in our patients* |
| 5 | *It can be hard for some of our patients to change their medication habits* |
| 6 | *Distraction from multiple PRN requests can lead to errors, however, reduction of PRN meds is a good thing* |
| 7 | *Agitation and anxiety are controlled with as needed medications, but other methods are good too* |
| 8 | *Coping skills and less toxic PRN medications are beneficial* |

**Supplement Figure 1**

PRN Deprescription QI Post-Implementation Survey

**KNOWLEDGE**

1. Patients may develop tolerance (lack of effectiveness overtime) from prolonged PRN medication use.

YES  NO

2. PRN medications may mask underlying symptoms or result in delayed treatment.

YES  NO

3. Medication errors are more likely to result from PRN medications as compared to scheduled medications.

YES  NO

4. Potential for overuse and abuse is higher with PRN medications.

YES  NO

5. PRN medications are more likely to lead to drug interactions.

YES  NO

6. PRN medications have iatrogenic effects and unmonitored PRN medication use may lead to prescribing cascades (the sequence of events in which an adverse drug event is misinterpreted as a new medical condition leading to the addition of another potentially avoidable medication).

YES  NO

**SKILLS**

1. Prior to this QI project did you routinely review PRN medications?

YES  NO

2. If yes, how did you how did you complete your review?

A. During every treatment team meeting.

B. Only when a clinical need arose.

3. Since the QI project, do you feel competent to deprescribe PRN medications.

YES  NO

4. For some potent PRN medications, do you recommend/use substitution with a suitable milder alternative or a non-pharmacological behavioral approach?

YES  NO

**ATTITUDES**

1. Changing frequently administered PRN medications to scheduled therapy reduces (clinical) burden on nursing staff

YES  NO

2. Deprescribing PRN medications reduces (administrative) burden for clinic staff

YES  NO

3. Most PRN medications do not require to be taken for long periods of time

YES  NO

4. Most PRN medications can be deprescribed?

YES  NO

5. Gradual tapering (reduction of the dose or frequency) is not always required for deprescription of a PRN medication.

YES  NO

6. Prior to the QI project did you routinely engage patients in a discussion of PRN medications?

YES  NO

7. Does shared decision making that includes active engagement and participation by patients in all treatment/medication decisions lead to better outcome?

YES  NO

8. Do you think that a systematic review of PRN medications during treatment team meetings leads to better clinical management?

YES  NO

9. In your experience does deprescribing improve patient safety and medication adherence (by reducing polypharmacy)?

YES  NO

10. Decision to deprescribe a PRN medication is informed by patient's current symptoms, medical/psychiatric history, review of recent use of PRN medications, and treatment goals.

YES  NO

11. Do the patients whose PRN medications are deprescribed mostly feel better about it?

YES  NO

12. In your experience, does deprescribing PRN medication have any impact on storage space/waste?

YES  NO

13. In your opinion, does deprescribed PRN medications increase effective communication in residential treatment regarding medication awareness and/or compliance?

YES  NO

14. Do you believe increased need for reordering of PRN medications occurs once medications were deprescribed?

YES  NO

15. Were you able to gauge improvement or decompensation of resident’s symptoms through auditing PRN medications?

YES  NO

16. Did auditing of PRN nicotine replacement therapies increase awareness of smoking cessation readiness?

YES  NO

17. During ongoing audit of PRN medications, have you observed monthly changes in specific medications, for example, Cogentin, Hydroxyzine, Melatonin, or nicotine replacement therapies?

YES  NO

18. On a scale of 1 to 10, 10 being the greatest insight, did residents on average benefit from discussion of PRN medication deprescription.

1 --------- 2 --------- 3 --------- 4 --------- 5 --------- 6 --------- 7 --------- 8 --------- 9 --------- 10

19. Do you have any takeaways from the PRN medications deprescription quality improvement project?

_______________________________________________________________________________

_______________________________________________________________________________

_______________________________________________________________________________
